# Supplementary material
Source: PubMed Central journal article supplement (PMC2705539)
Supplement: 0809903106_0809903106SI.pdf [file 0809903106_0809903106SI.pdf]

# Supporting Information

Ajami et al. 10.1073/pnas.0809903106

## SI Text

<sup>1</sup>H NMR spectra were recorded on a Bruker DRX-600 spectrometer with a 5-mm QNP probe. Proton (<sup>1</sup>H) chemical shifts, reported in parts per million (ppm), were indirectly

referenced to external tetramethylsilane employing resonance as an internal reference. Deuterated mesitylene was obtained from Cambridge Isotope Laboratories, Inc.

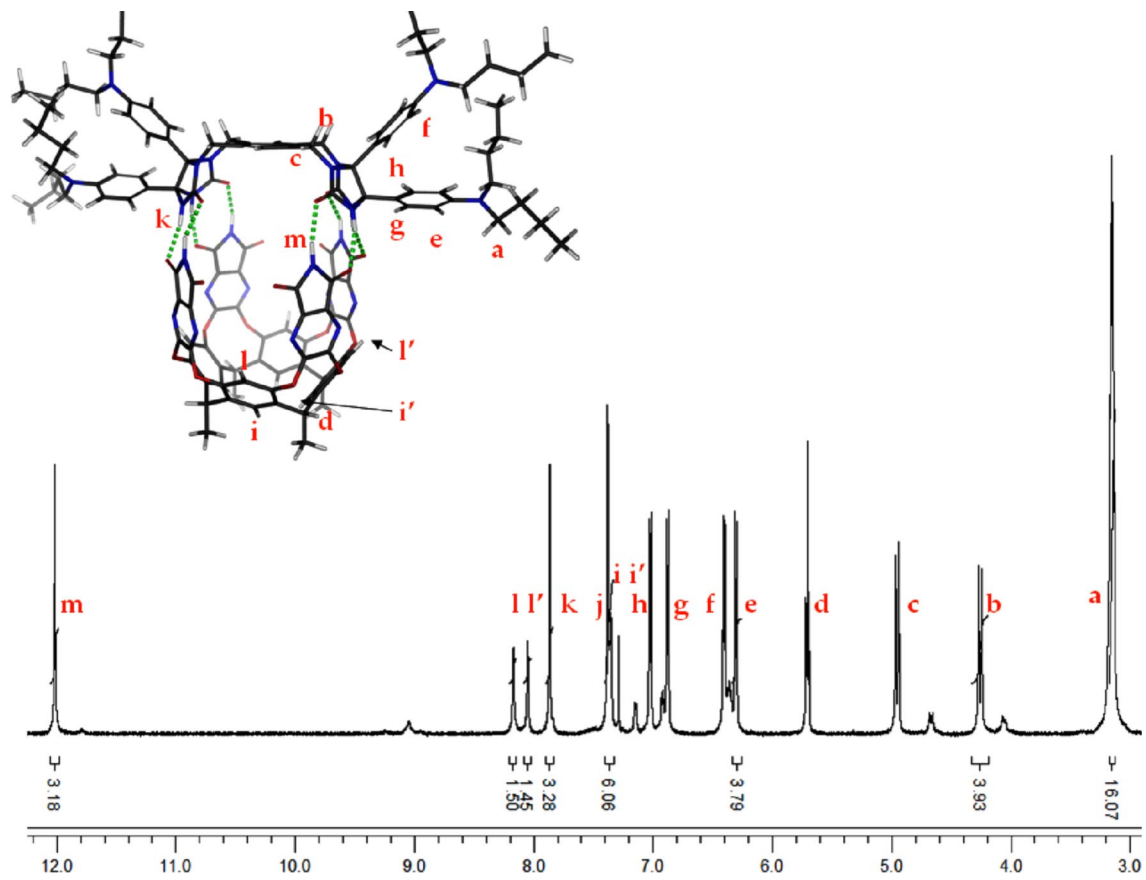

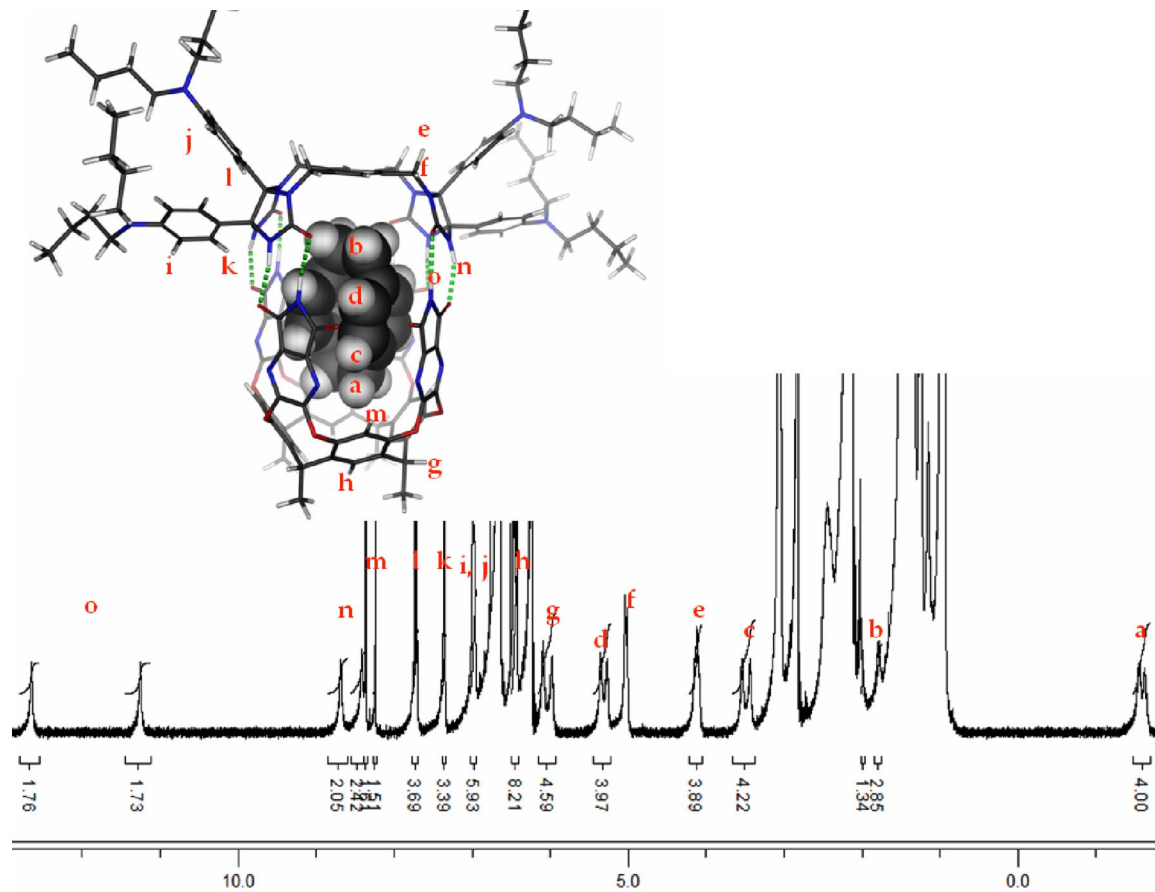

Fig. S2.  $^1\text{H}$  NMR assignment of encapsulated paracyclophane in 2.3 (mesitylene- $d_{12}$ , 300 K).

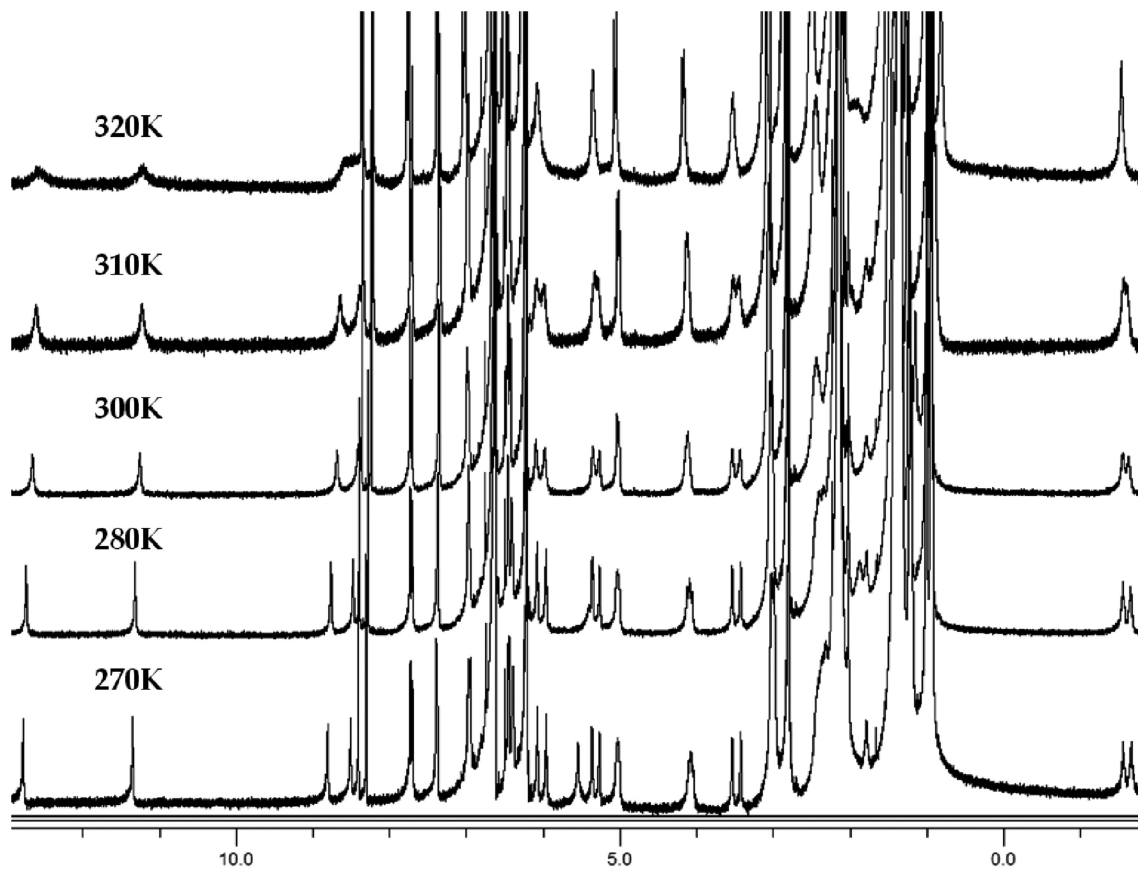

Fig. S3.  $^1\text{H}$  NMR spectra ( $\text{mesitylene-}d_{12}$ , 300 K) of encapsulated paracyclophane in 2.3 at different temperature.

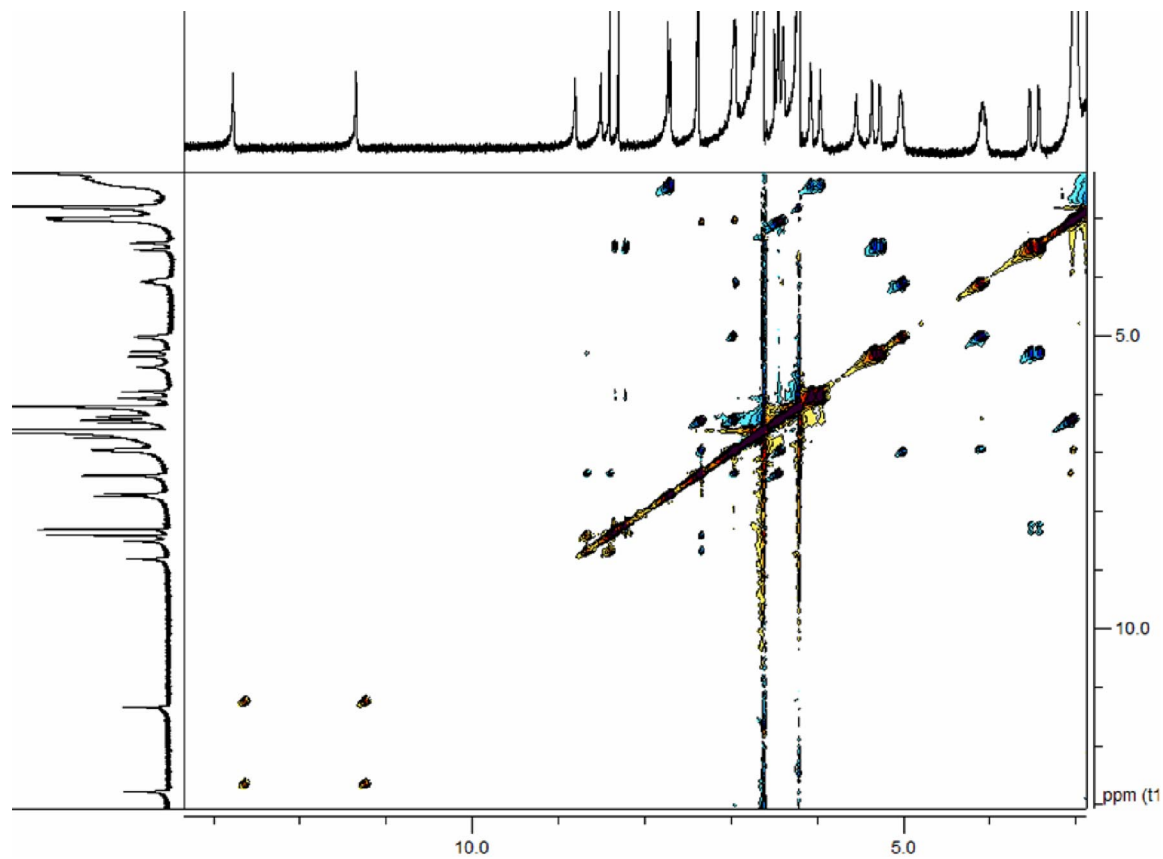

**Fig. S4.** Partial 2D ROESY spectrum (mesitylene- $d_{12}$ , 300 K, mixing time = 0.3 s, D1 = 3 s) of encapsulated paracyclophane in **2.3**. The cross-peaks indicate exchange of 2 enantiomer on the NMR timescale.

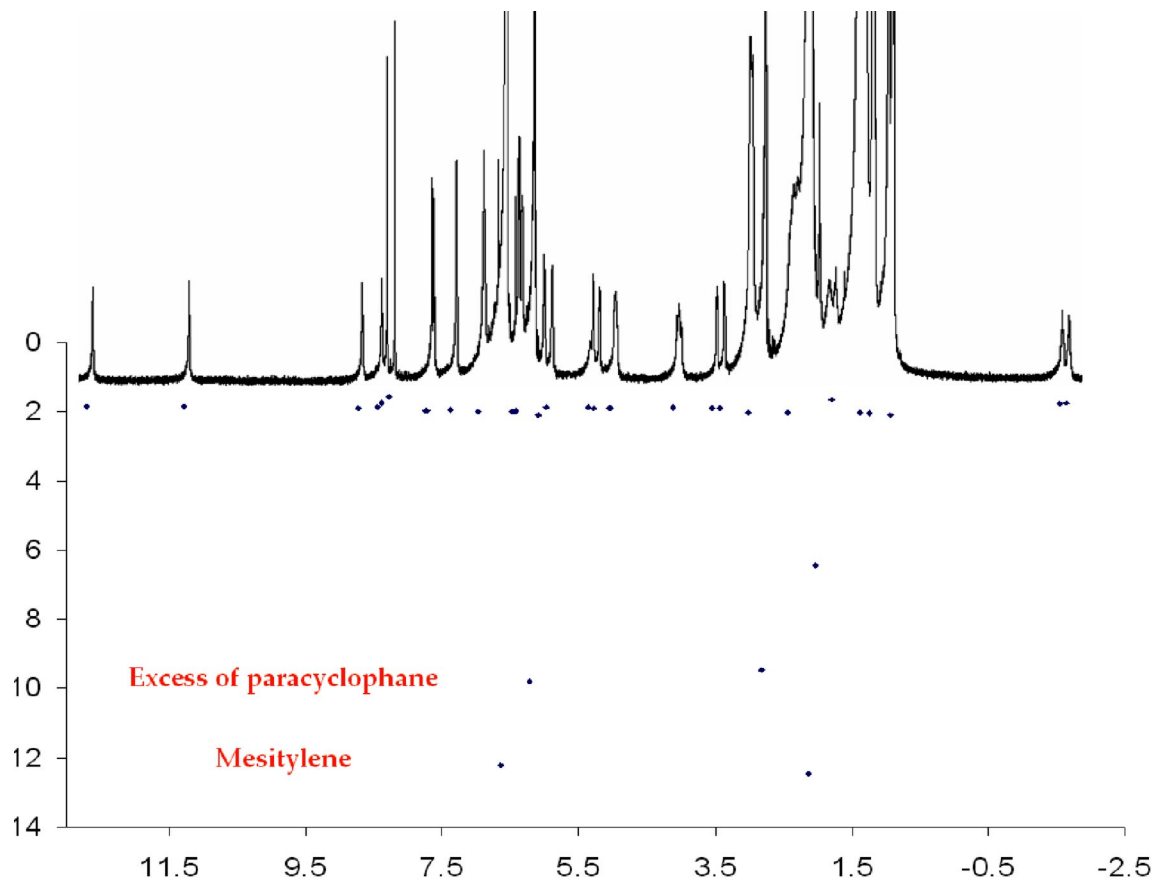

**Fig. S5.** DOSY spectrum (mesitylene-*d*<sub>12</sub>, 290 K) of encapsulated paracyclophane in **2.3**. The cavitand **2** and half of tennis ball **3**<sub>2</sub> and paracyclophane diffuse as a single species. The average diffusion coefficient for this complex is  $1.87 \times 10^{-10} \text{ m}^2\text{s}^{-1}$ .

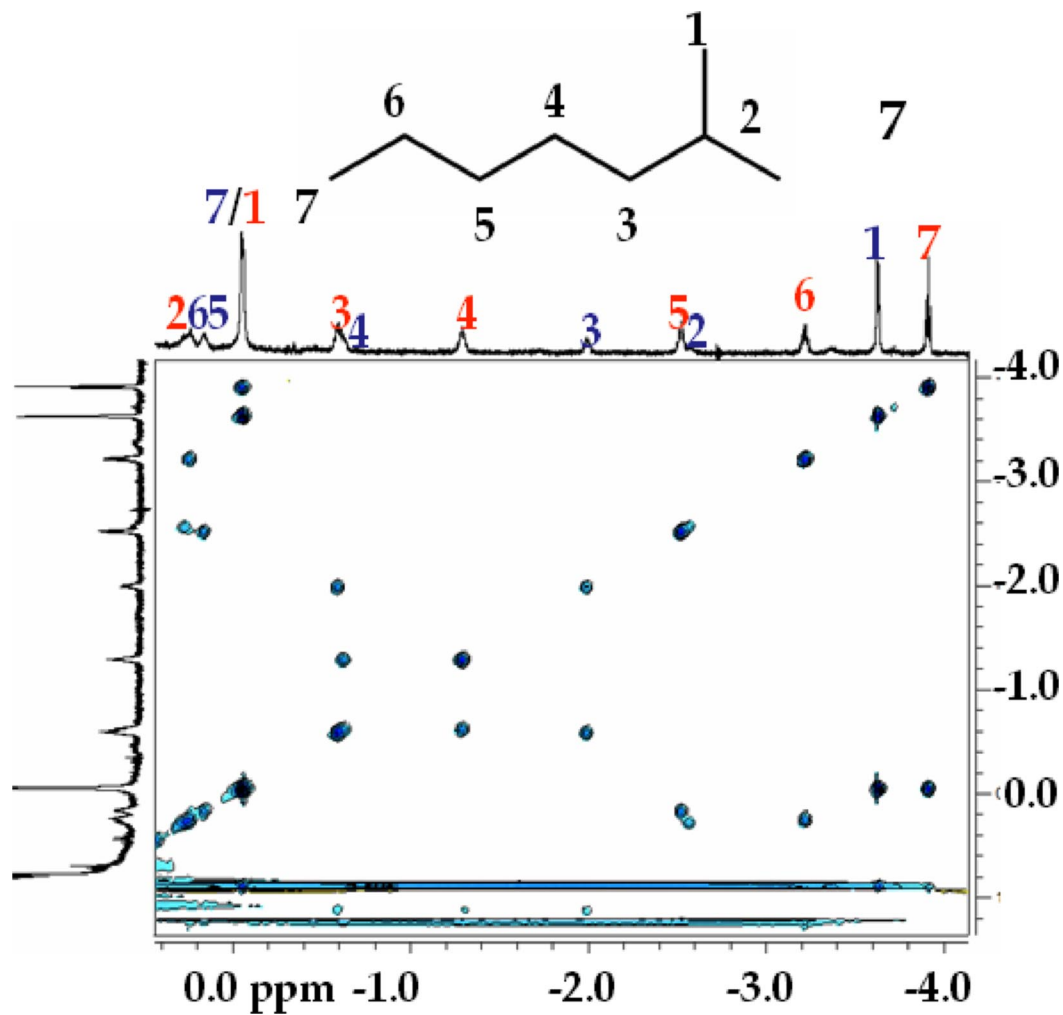

Fig. S6. Upfield regions of 2D ROESY spectrum (mesitylene-*d*<sub>12</sub>, 300 K, mixing time = 0.3 s, D1 = 3 s) of encapsulated 2-dimethyl heptane 7 in 2.3.

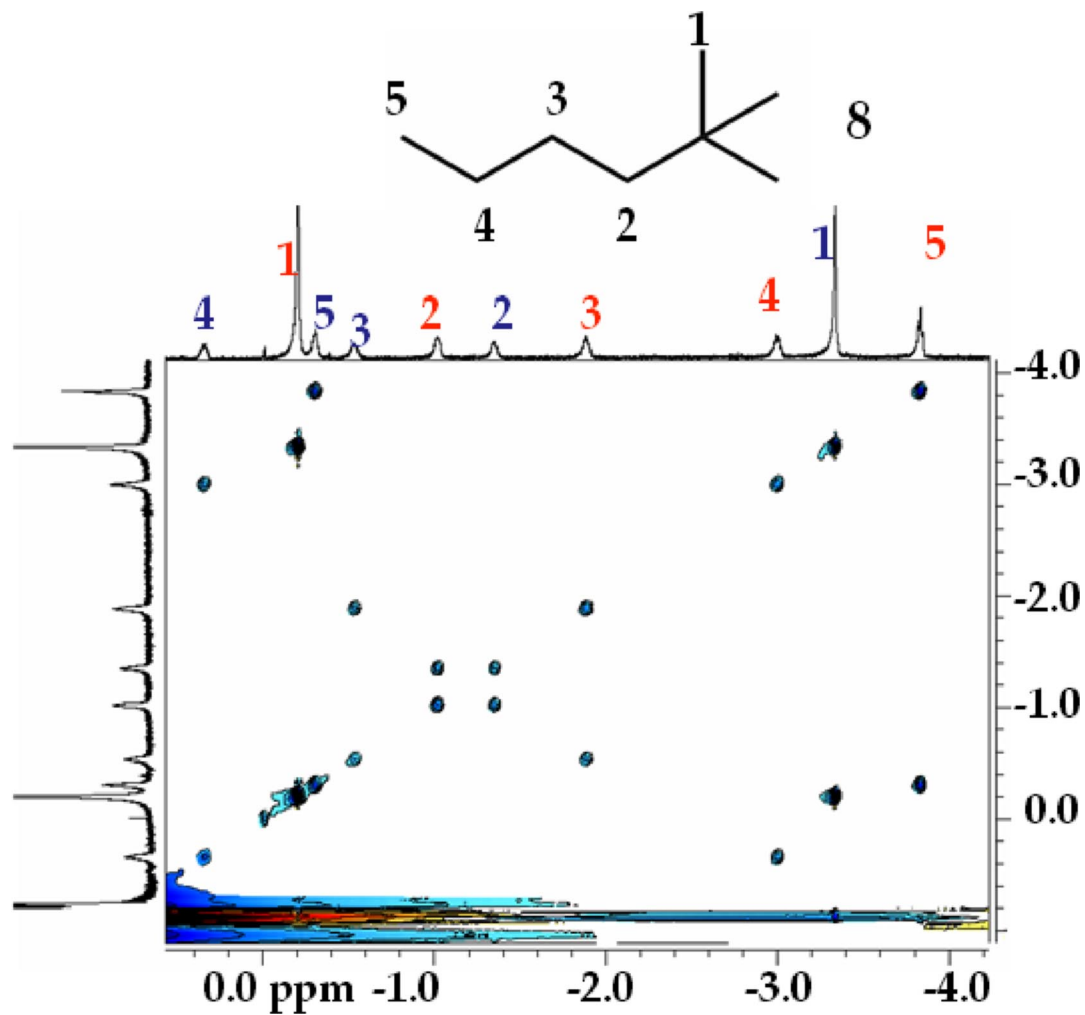

Fig. S7. Upfield regions of 2D ROESY spectrum (mesitylene- $d_{12}$ , 300 K, mixing time = 0.3 s, D1 = 3 s) of encapsulated 2,2-dimethyl hexane **8** in 2.3.



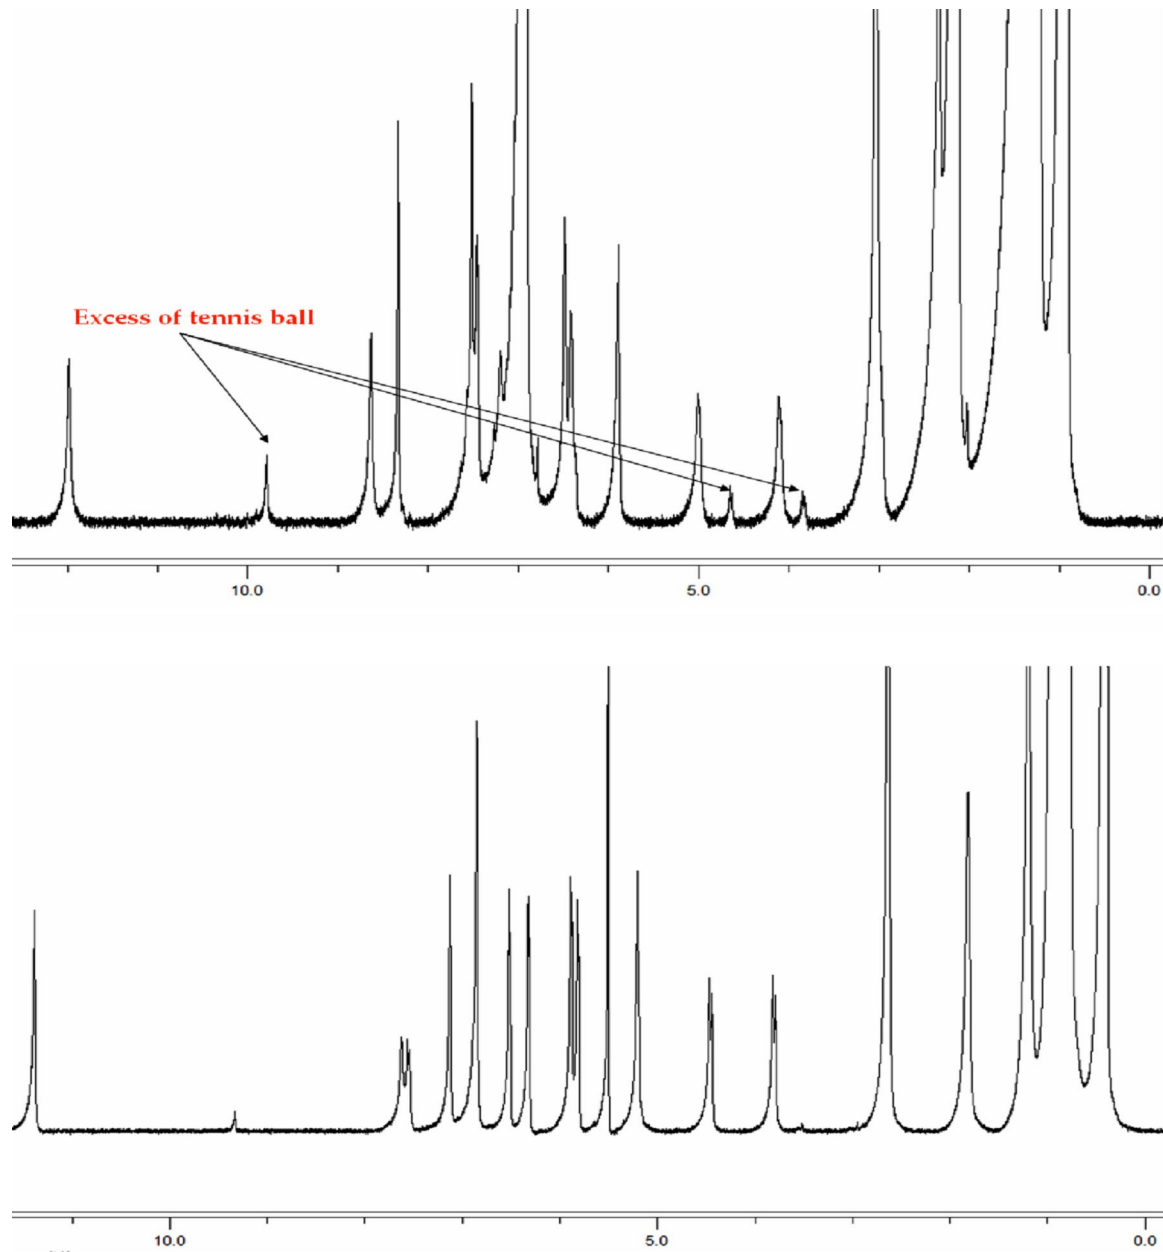

Fig. 58.  $^1\text{H}$  NMR spectra of hybrid capsule 2.3 in  $\text{paraxylene-}d_{10}$ , 300 K (Upper) and  $\text{tetrachloroethane-}d_2$ , 300 K (Lower).

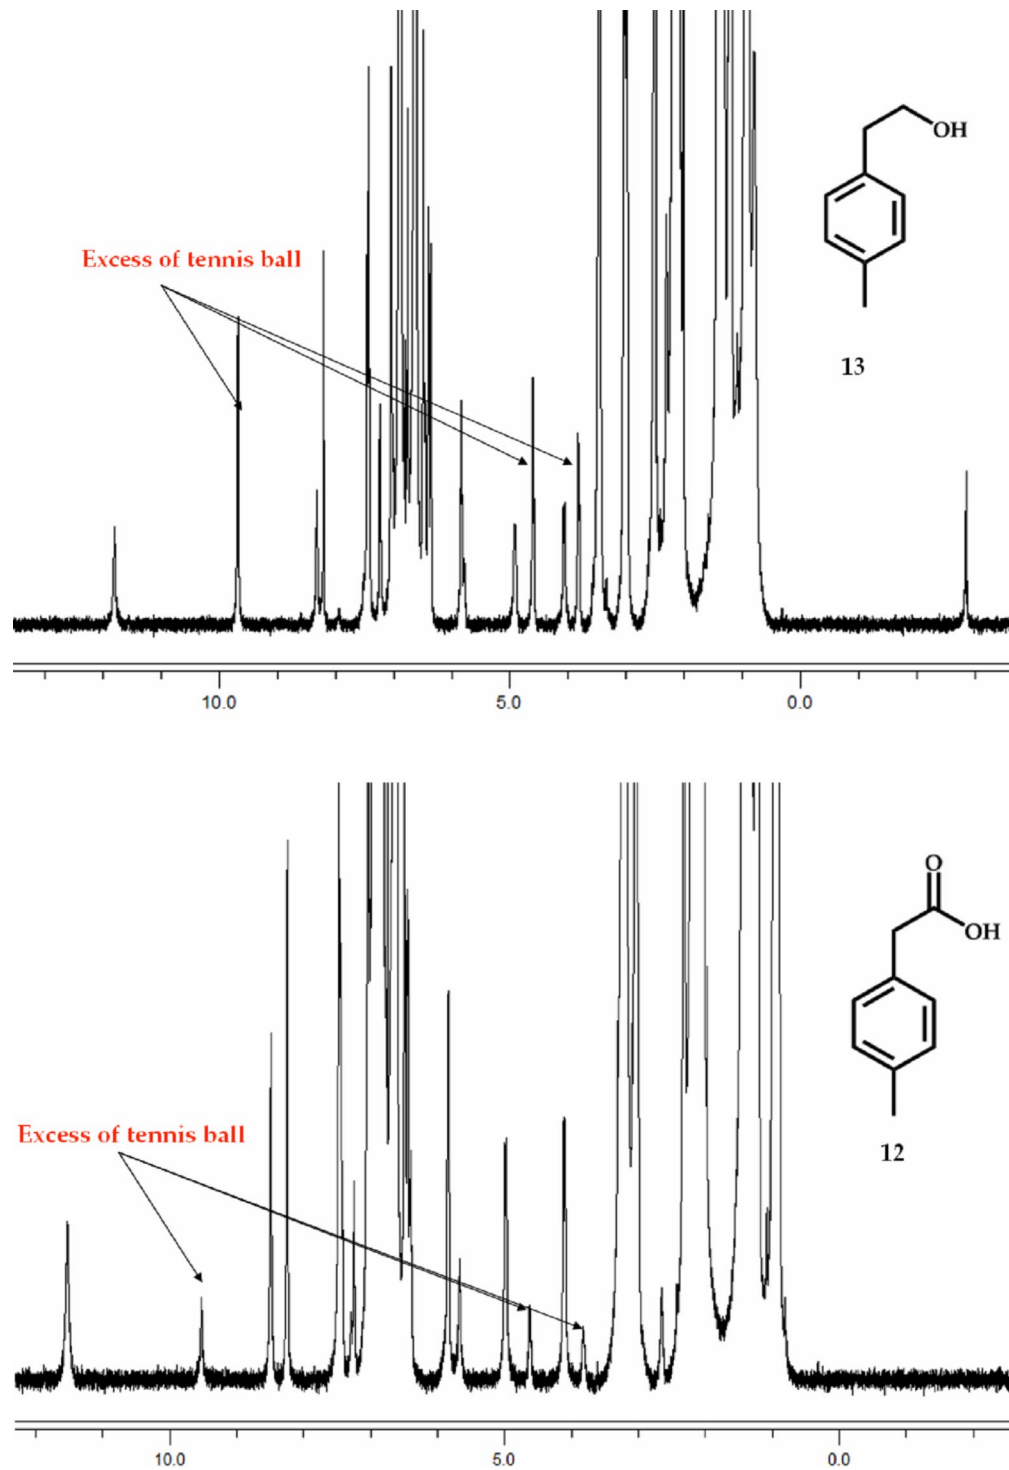

Fig. S9. <sup>1</sup>H NMR spectra (mesitylene-*d*<sub>12</sub>, 300 K) of encapsulation of 4-methylphenethyl alcohol 12 in hybrid capsule 2.3 (Upper) and encapsulation of 4-methylphenyl acetic acid 13 in hybrid capsule 2.3 (Lower).

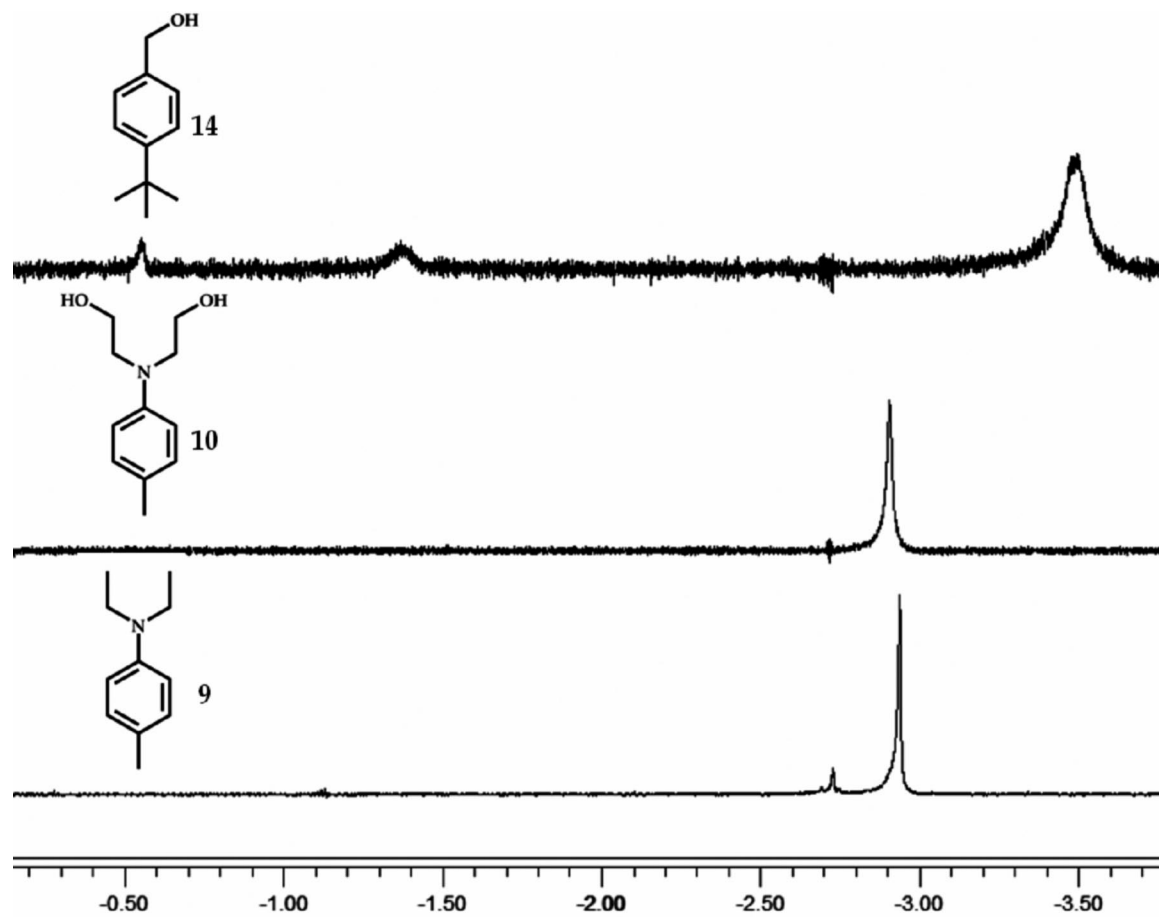

Fig. S10. Partial <sup>1</sup>H NMR spectra (mesitylene-*d*<sub>12</sub>, 300 K) of hybrid capsule 2.3 complexes with *N,N*-diethyl-*p*-toluidine 9, *p*-tolyl-diethanol amine 10, 4-tert-butylbenzyl alcohol 14.

**Table S1. Diffusion coefficient value for complex of paracyclophane in 1.2**

| Peak, ppm | Diffusion coefficient, $10^{-10} \text{ m}^2\text{s}^{-1}$ | Error, $10^{-5}$ |
|-----------|------------------------------------------------------------|------------------|
| 12.701    | 1.841                                                      | 6.825            |
| 11.281    | 1.839                                                      | 7.849            |
| 8.739     | 1.894                                                      | 9.258            |
| 8.454     | 1.869                                                      | 9.106            |
| 8.384     | 1.753                                                      | 3.038            |
| 8.269     | 1.567                                                      | 4.541            |
| 7.744     | 1.968                                                      | 1.458            |
| 7.716     | 1.963                                                      | 1.326            |
| 7.375     | 1.941                                                      | 2.109            |
| 6.978     | 1.982                                                      | 1.186            |
| 4.122     | 1.856                                                      | 1.175            |
| 3.554     | 1.886                                                      | 1.119            |
| 3.441     | 1.9                                                        | 1.007            |
| 3.029     | 2.026                                                      | 2.607            |
| 2.829     | 9.478                                                      | 9.759            |
| 2.432     | 2.011                                                      | 4.19             |
| 2.134     | 12.45                                                      | 9.079            |
| 2.034     | 6.43                                                       | 1.098            |
| 1.793     | 1.648                                                      | 3.376            |
| 1.381     | 2.014                                                      | 1.505            |
| 1.239     | 2.034                                                      | 4.882            |
| 0.941     | 2.083                                                      | 6.65             |
| -1.545    | 1.761                                                      | 7.342            |
| -1.645    | 1.75                                                       | 5.282            |
